# Supplementary material for: Knowledge, beliefs and attitudes of Muslim footballers towards Ramadan fasting during the London 2012 Olympics: a cross-sectional study
Source: PubMed Central journal article supplement — BMJ Open. 2016 Sep 23;6(9):e012848. doi: 10.1136/bmjopen-2016-012848 (PMC5051417; doi:10.1136/bmjopen-2016-012848), 2016-09-23
Supplement: bmjopen-2016-012848supp.pdf [file bmjopen-2016-012848supp.pdf]

## Knowledge, Attitude and Practice of Ramadan Fasting among Olympic Athletes

| I think....                                                                                             | Strongly agree | Agree | Neutral | Disagree | Strongly Disagree |
|---------------------------------------------------------------------------------------------------------|----------------|-------|---------|----------|-------------------|
| Ramadan fasting can reduce my endurance/stamina during game                                             | ①              | ②     | ③       | ④        | ⑤                 |
| Ramadan fasting can make me weaker day by day                                                           | ①              | ②     | ③       | ④        | ⑤                 |
| Ramadan fasting will reduce my physical skills                                                          | ①              | ②     | ③       | ④        | ⑤                 |
| Ramadan fasting will reduce my sleep quality                                                            | ①              | ②     | ③       | ④        | ⑤                 |
| If I am properly hydrated at Suhoor, I can practice game or training without any problem while fasting? | ①              | ②     | ③       | ④        | ⑤                 |
| Ramadan fasting will reduce my concentration during game                                                | ①              | ②     | ③       | ④        | ⑤                 |
| Ramadan fasting will reduce my sleep time.                                                              | ①              | ②     | ③       | ④        | ⑤                 |
| Ramadan fasting can reduce my power during game                                                         | ①              | ②     | ③       | ④        | ⑤                 |
| Ramadan fasting will reduce my mental skills                                                            | ①              | ②     | ③       | ④        | ⑤                 |
| I believe....                                                                                           | Strongly agree | Agree | Neutral | Disagree | Strongly Disagree |
| 17hrs of Ramadan fasting in UK can be a challenge.                                                      | ①              | ②     | ③       | ④        | ⑤                 |
| Ramadan fasting will make me mentally stronger                                                          | ①              | ②     | ③       | ④        | ⑤                 |
| My family and friends want me to fast in Ramadan                                                        | ①              | ②     | ③       | ④        | ⑤                 |
| It is not a problem for future sports events to take place during Ramadan                               | ①              | ②     | ③       | ④        | ⑤                 |
| Ramadan fasting will increase my confidence                                                             | ①              | ②     | ③       | ④        | ⑤                 |
| I think it is OK to postpone my Ramadan fasting until after Olympics                                    | ①              | ②     | ③       | ④        | ⑤                 |
| Ramadan fasting will make me physically stronger                                                        | ①              | ②     | ③       | ④        | ⑤                 |
| My coach wants me not to fast in Ramadan                                                                | ①              | ②     | ③       | ④        | ⑤                 |

Practice:

Ramadan Fasting

Do you plan to fast during the Ramadan month? ..... [Y/N]

If yes, will you

[1] Fast all days

[2] Skip only on Match days and compensate later

[3] Skip only on Training days and compensate later

[4] Skip on Match or Training days and compensate later
